# Supplementary material for: ClustScan: an integrated program package for the semi-automatic annotation of modular biosynthetic gene clusters and in silico prediction of novel chemical structures
Source: PubMed Central journal article supplement — Nucleic Acids Res. 2008 Oct 31;36(21):6882–92. doi: 10.1093/nar/gkn685 (PMC2588505; doi:10.1093/nar/gkn685), 2008-10-31

## **Supplementary Data 1**

Table 1S Specificity of PKS domains

Table 2S Fingerprints of KR domains

Table 3S Fingerprints of AT domains

Table 4S SMILES of starter and extender building blocks

Fig. 1S Functional prediction of the DNA sequence of the erythromycin gene-cluster

Fig. 2S Functional prediction of the DNA sequence of the niddamycin gene-cluster

Table 1S Specificity of PKS domains

| Domain        | Activity                                           | Choices                                                                                                                                                                                                                                    |
|---------------|----------------------------------------------------|--------------------------------------------------------------------------------------------------------------------------------------------------------------------------------------------------------------------------------------------|
| AT starter    | acyl transferase                                   | <b>selection of substrate</b><br>malonyl<br>propionyl<br>methylbutyryl                                                                                                                                                                     |
| Starter no AT | -                                                  | <b>selection of substrate</b><br>3,4-DHCHC<br>3,5-AHBA<br>p-nitrobenzoate<br>trans-1,2-CPDA<br>hydroxymalonyl<br>phenylacetyl<br>p-aminobenzoate<br>3-methylbutyryl<br>cyclohexanecarboxylic acid<br>benzoyl<br>3-amino-2-methylpropionate |
| ACP           | acyl carrier protein                               | generic, no specificity                                                                                                                                                                                                                    |
| KS            | ketosynthase                                       | generic, no specificity                                                                                                                                                                                                                    |
| AT extender   | acyl transferase                                   | <b>selection of substrate</b><br>malonyl<br>methoxymalonyl<br>methylmalonyl<br>ethylmalonyl                                                                                                                                                |
| KR            | ketoreductase<br>reduces C=O to OH                 | active vs inactive<br>stereochemistry of OH (R or S)<br>stereochemistry of $\beta$ -carbon atom (R or S)                                                                                                                                   |
| DH            | dehydratase<br>reduces OH to C=C                   | active vs inactive<br><i>cis/trans</i> orientation of double bond                                                                                                                                                                          |
| ER            | enoyl reductase<br>reduces C=C                     | active vs inactive<br>stereochemistry of OH (R or S)<br>stereochemistry of $\beta$ -carbon atom (R or S)                                                                                                                                   |
| TE            | thioesterase release<br>from enzyme<br>cyclization | generic, no specificity                                                                                                                                                                                                                    |

Table 2S Fingerprints of KR domains

Reference sequence = 'Erythromycin\_KR\_module01'

Key residues:

Activity = 113, 137, 150, 154

Specificity = 93, 94, 95, 142, 147, 150, 152, 154

*Hmmalign* is used with the profile constructed for all KR's and the amino-acid alignment from which the profile was built

| Type   | Regular expressions describing activity of this KR type |
|--------|---------------------------------------------------------|
| active | K[S,A,G]YN or E[S,A,G]HH or K[S,A,G]Y[N,G]              |

| Type | Regular expressions describing specificity of this KR type |
|------|------------------------------------------------------------|
| A1   | LDD and W[anything except H]YAN                            |
| A2   | LDD and WHYAN                                              |
| B1   | LDDXXY[anything except P]N                                 |
| B2   | LDDXXYPN                                                   |
| C1   | XXXXX[anything except Y]XX                                 |
| C2   | XXXXXYX[anything except N]                                 |

X – Stands for any amino acid including gaps (-)

Table 3S Fingerprints of AT domains

Reference sequence = 'Erythromycin\_AT\_module01\_C3'

Key residues = 7, 70, 96, 97, 98, 99, 100, 123, 197, 198, 229, 248, 253

*Hmmalign* is used with the profile constructed for all AT's and the amino-acid alignment from which the profile was built

LEGEND:

| Building block | Regular expressions describing specificity of this AT type |
|----------------|------------------------------------------------------------|
| malonyl        | QQGHS[L,V,I,F,M]GR[F,P]H[A,N,T,G,E,D,S,-][N,H,Q]V          |
| methylmalonyl  | QQGHS[Q,M,I]GRSHT[N,S]V                                    |
| ethylmalonyl   | Q[Q,H]G[H,S]S[Q,L]GR[G,T,A]HTNV                            |
| propionyl      | QQGHS[Q,M,I]GWAH[S,G]SV                                    |
| methylbutyryl  | QQGHS[Q,M,I]GWAH[S,G]NV                                    |

Methoxymalonyl-specific AT's were first assigned as an unknown group. These sequences were then checked for positions specific for methoxymalonyl by looking at:

Reference sequence 1 = 'Concanamycin A\_AT006\_1\_hidro'

Reference sequence 2 = 'Ascomycin\_AT007\_1\_hidro'

Key residues 1 = 182, 184

Key residues 2 = 221, 222

For the methoxymalonyl a new profile with only methoxymalonyl AT's was built and used for the alignment and position extraction.

LEGEND:

| Building block | Regular expressions describing specificity of this AT type     |
|----------------|----------------------------------------------------------------|
| methoxymalonyl | XW from key residues 1 or PX from key residues 2 is sufficient |

With this fingerprints all AT containing loading modules and most of extender modules were covered. Unknown/non-predictable building blocks were named internally as CX and were assigned with "C(\*)~C(\*)" SMARTS structure.

X – Stands for any amino acid including gaps (-)

Extenders:

Malonyl, methoxymalonyl, methylmalonyl, ethylmalonyl

Starters: malonyl, propionyl, methylbutyryl

Table 4S SMILES of starter and extender building blocks

|      |                                                                       |
|------|-----------------------------------------------------------------------|
| C2_1 | CC(=O); CC(O); C[C@H](O); C[C@@H](O); C=C; CC                         |
| C2_2 |                                                                       |
| C2_3 |                                                                       |
| C2_4 |                                                                       |
| C3_1 | C(C)C(=O); [C@H](C)C(=O); [C@@H](C)C(=O); C(C)C(O); C(C)[C@H](O);     |
| C3_2 | C(C)[C@@H](O); [C@H](C)C(O); [C@@H](C)C(O); [C@H](C)[C@H](O);         |
| C3_3 | [C@H](C)[C@@H](O); [C@@H](C)[C@H](O); [C@@H](C)[C@@H](O);             |
| C3_4 | C(C)=C; C(C)C [C@H](C)C [C@@H](C)C; C(C)C; [C@H](C)C [C@@H](C)C       |
| MM_1 | C(CC)C(=O); [C@H](CC)C(=O); [C@@H](CC)C(=O); C(CC)C(O);               |
| MM_2 | C(CC)[C@H](O); C(CC)[C@@H](O); [C@H](CC)C(O); [C@@H](CC)C(O);         |
| MM_3 | [C@H](CC)[C@H](O); [C@H](CC)[C@@H](O); [C@@H](CC)[C@H](O);            |
| MM_4 | [C@@H](CC)[C@@H](O); C(CC)=C; C(CC)C; [C@H](CC)C; [C@@H](CC)C;        |
| EM_1 | C(CC)C(=O); [C@H](CC)C(=O); [C@@H](CC)C(=O); C(CC)C(O) C(CC)[C@H](O); |
| EM_2 | C(CC)[C@@H](O); [C@H](CC)C(O); [C@@H](CC)C(O);                        |
| EM_3 | [C@H](CC)[C@H](O); [C@H](CC)[C@@H](O); [C@@H](CC)[C@H](O);            |
| EM_4 | [C@@H](CC)[C@@H](O); C(CC)=C; C(CC)C; [C@H](CC)C<br>[C@@H](CC)C       |
| MB_1 | CCC(C)C(=O); CC[C@H](C)C(=O); CC[C@@H](C)C(=O); CCC(C)C(O)            |
| MB_2 | CCC(C)[C@H](O); CCC(C)[C@@H](O); CC[C@H](C)C(O); CC[C@@H](C)C(O);     |
| MB_3 | CC[C@H](C)[C@H](O); CC[C@H](C)[C@@H](O); CC[C@@H](C)[C@H](O);         |
| MB_4 | CC[C@@H](C)[C@@H](O); CCC(C)=C;<br>CCC(C)C; CC[C@H](C)C; CC[C@@H](C)C |
| CX_1 | C(*)C(*)                                                              |

**Extenders:** malonyl (C2), methylmalonyl (C3), methoxymalonyl (MM), ethylmalonyl (EM), unknown (CX)

**Starters:** malonyl (C2), propionyl (C3), methylbutyryl (MB)

Fig. 1S Functional prediction of the DNA sequence (AY771999) of the erythromycin gene-cluster. The three genes (in red), six modules (underlined in red) and 29 catalytically active domains (in blue) of the erythromycin gene-cluster are shown. In particular, the inactive KR in module 3 responsible for the hydroxyl-stereochemistry: S stereochemistry was predicted. In module 4, the inability of the program to predict the stereochemical outcome from the KR module is unimportant, because of the presence of the DH domain that destroys the chirality. However, the inability to predict the  $\beta$ -carbon stereochemistry of the ER domain prevents prediction of the stereochemistry at this position in the final linear chain. (A). The isomeric SMILES as well as the 3-D structure of the predicted linear chain is also shown (B top and right). The cyclization function predicts a ring structure that can also be displayed (B left).

A

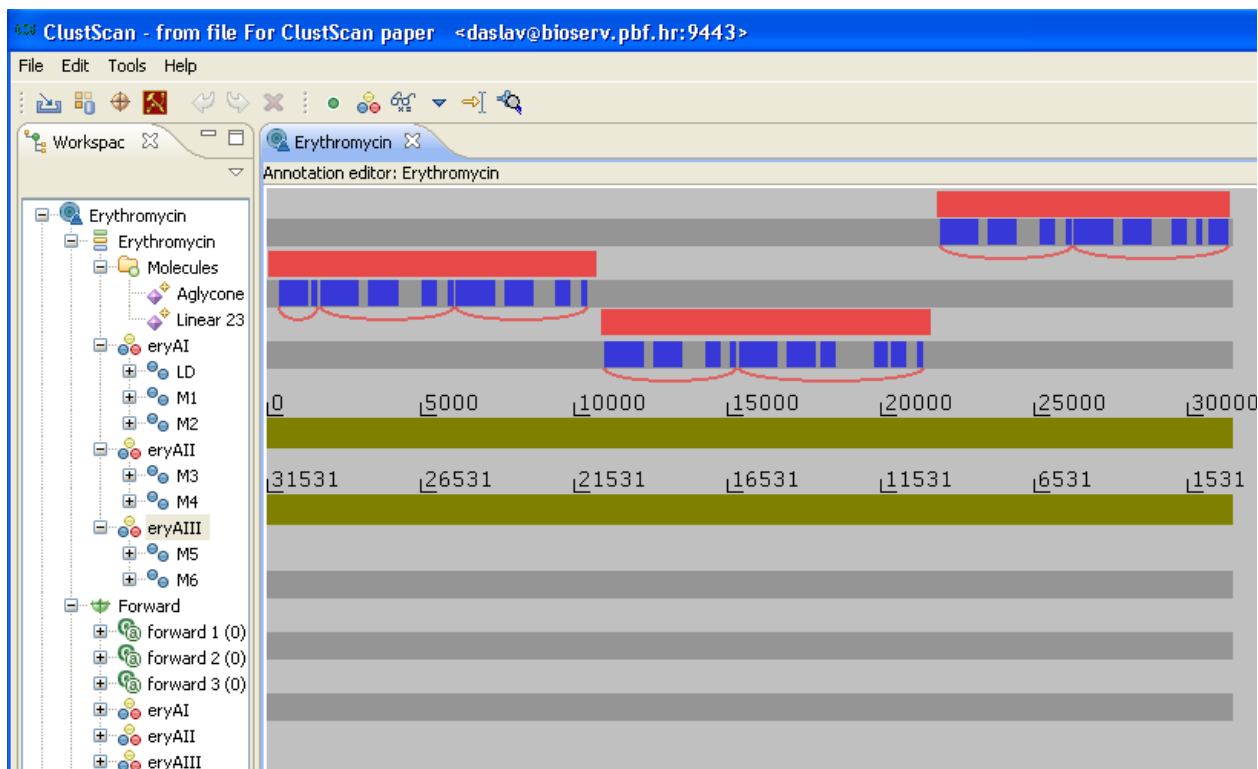

# Gene: *eryAI*

## LD

Two 'Details' windows showing domain properties for AT and ACP. Each window includes a 'Domain properties' section with a 'Show in workspace' link and a 'Color' button.

| Domain | DNA coordinates     | Protein coordinates | Score   | E-value      | Specificity                           |
|--------|---------------------|---------------------|---------|--------------|---------------------------------------|
| AT     | 414..1362 (948 pb)  | 137..453 (316 aa)   | 551.879 | 5.16365E-166 | Prediction: <a href="#">propionyl</a> |
| ACP    | 1494..1695 (201 pb) | 497..564 (67 aa)    | 67.528  | 3.28961E-20  |                                       |

## M1

Four 'Details' windows showing domain properties for KS, ACP, AT, and KR. Each window includes a 'Domain properties' section with a 'Show in workspace' link and a 'Color' button.

| Domain | DNA coordinates      | Protein coordinates | Score   | E-value      | Specificity                                                                                      |
|--------|----------------------|---------------------|---------|--------------|--------------------------------------------------------------------------------------------------|
| KS     | 1767..3036 (1269 pb) | 588..1011 (423 aa)  | 1029.45 | 0.0          |                                                                                                  |
| ACP    | 5916..6117 (201 pb)  | 1971..2038 (67 aa)  | 82.347  | 1.1381E-24   |                                                                                                  |
| AT     | 3339..4308 (969 pb)  | 1112..1435 (323 aa) | 591.303 | 7.00108E-178 | Prediction: <a href="#">methylmalonyl</a>                                                        |
| KR     | 5085..5583 (498 pb)  | 1694..1860 (166 aa) | 298.075 | 1.30493E-89  | Activity: <input checked="" type="checkbox"/> Active<br>Chirality of Me: S<br>Chirality of OH: R |

## M2

Four 'Details' windows showing domain properties for KS, ACP, AT, and KR. Each window includes a 'Domain properties' section with a 'Show in workspace' link and a 'Color' button.

| Domain | DNA coordinates       | Protein coordinates | Score   | E-value      | Specificity                                                                                      |
|--------|-----------------------|---------------------|---------|--------------|--------------------------------------------------------------------------------------------------|
| KS     | 6192..7461 (1269 pb)  | 2063..2486 (423 aa) | 914.315 | 4.0631E-275  |                                                                                                  |
| ACP    | 10257..10458 (201 pb) | 3418..3485 (67 aa)  | 64.097  | 3.54796E-19  |                                                                                                  |
| AT     | 7773..8733 (960 pb)   | 2590..2910 (320 aa) | 589.716 | 2.10326E-177 | Prediction: <a href="#">methylmalonyl</a>                                                        |
| KR     | 9420..9915 (495 pb)   | 3139..3304 (165 aa) | 260.726 | 2.28432E-78  | Activity: <input checked="" type="checkbox"/> Active<br>Chirality of Me: R<br>Chirality of OH: S |

# Gene: *eryAII*

## M3

Four screenshots showing domain details for M3. Each window displays domain name, domain properties, DNA coordinates, protein frame, protein coordinates, score, E-value, and specificity.

- KS**
  - Domain properties: [Show in workspace](#)
  - DNA coordinates: 11049..12321 (1272 pb) [Color](#)
  - Protein frame: Forward 3
  - Protein coordinates: 3681..4105 (424 aa)
  - Score: 1030.32
  - E-value: 0.0
  - Specificity:
- ACP**
  - Domain properties: [Show in workspace](#)
  - DNA coordinates: 15147..15348 (201 pb) [Color](#)
  - Protein frame: Forward 3
  - Protein coordinates: 5047..5114 (67 aa)
  - Score: 88.558
  - E-value: 1.53632E-26
  - Specificity:
- AT**
  - Domain properties: [Show in workspace](#)
  - DNA coordinates: 12630..13593 (963 pb) [Color](#)
  - Protein frame: Forward 3
  - Protein coordinates: 4208..4529 (321 aa)
  - Score: 602.927
  - E-value: 2.21812E-181
  - Specificity: Prediction: [methylmalonyl](#)
- KR**
  - Domain properties: [Show in workspace](#)
  - DNA coordinates: 14346..14808 (462 pb) [Color](#)
  - Protein frame: Forward 3
  - Protein coordinates: 4780..4934 (154 aa)
  - Score: 153.492
  - E-value: 4.35914E-46
  - Activity:  Inactive
  - Specificity: Chirality of Me: 5

## M4

Six screenshots showing domain details for M4. Each window displays domain name, domain properties, DNA coordinates, protein frame, protein coordinates, score, E-value, and specificity.

- KS**
  - Domain properties: [Show in workspace](#)
  - DNA coordinates: 15423..16692 (1269 pb) [Color](#)
  - Protein frame: Forward 3
  - Protein coordinates: 5139..5562 (423 aa)
  - Score: 1076.03
  - E-value: 0.0
  - Specificity:
- ACP**
  - Domain properties: [Show in workspace](#)
  - DNA coordinates: 21201..21402 (201 pb) [Color](#)
  - Protein frame: Forward 3
  - Protein coordinates: 7065..7132 (67 aa)
  - Score: 62.464
  - E-value: 1.10042E-18
  - Specificity:
- AT**
  - Domain properties: [Show in workspace](#)
  - DNA coordinates: 16992..17949 (957 pb) [Color](#)
  - Protein frame: Forward 3
  - Protein coordinates: 5662..5981 (319 aa)
  - Score: 585.827
  - E-value: 3.11595E-176
  - Specificity: Prediction: [methylmalonyl](#)
- DH**
  - Domain properties: [Show in workspace](#)
  - DNA coordinates: 18063..18570 (507 pb) [Color](#)
  - Protein frame: Forward 3
  - Protein coordinates: 6019..6188 (169 aa)
  - Score: 252.657
  - E-value: 6.13427E-76
  - Activity:  Active
  - Specificity:
- ER**
  - Domain properties: [Show in workspace](#)
  - DNA coordinates: 19821..20286 (465 pb) [Color](#)
  - Protein frame: Forward 3
  - Protein coordinates: 6605..6760 (155 aa)
  - Score: 76.514
  - E-value: 6.48767E-23
  - Activity:  Active
  - Specificity:
- KR**
  - Domain properties: [Show in workspace](#)
  - DNA coordinates: 20373..20868 (495 pb) [Color](#)
  - Protein frame: Forward 3
  - Protein coordinates: 6789..6954 (165 aa)
  - Score: 298.679
  - E-value: 8.58529E-90
  - Activity:  Active
  - Specificity: Chirality of Me: unknown  
Chirality of OH: R



# Gene: *eryAIII*

## M5

Four 'Details' windows showing domain properties for KS, ACP, AT, and KR domains. Each window includes a 'Show in workspace' link and a 'Color' button.

- KS**
  - Domain properties: [Show in workspace](#)
  - DNA coordinates: 21996..23235 (1239 pb) [Color](#)
  - Protein frame: Forward 1
  - Protein coordinates: 7332..7745 (413 aa)
  - Score: 1018.37
  - E-value: 1.92288E-306
  - Specificity:
- ACP**
  - Domain properties: [Show in workspace](#)
  - DNA coordinates: 26052..26253 (201 pb) [Color](#)
  - Protein frame: Forward 1
  - Protein coordinates: 8684..8751 (67 aa)
  - Score: 77.059
  - E-value: 4.44658E-23
  - Specificity:
- AT**
  - Domain properties: [Show in workspace](#)
  - DNA coordinates: 23541..24492 (951 pb) [Color](#)
  - Protein frame: Forward 1
  - Protein coordinates: 7847..8164 (317 aa)
  - Score: 488.734
  - E-value: 5.26636E-147
  - Specificity: Prediction: [methylmalonyl](#)
- KR**
  - Domain properties: [Show in workspace](#)
  - DNA coordinates: 25221..25716 (495 pb) [Color](#)
  - Protein frame: Forward 1
  - Protein coordinates: 8407..8572 (165 aa)
  - Score: 295.655
  - E-value: 6.98353E-69
  - Activity:  Active
  - Specificity: Chirality of Me: R  
Chirality of OH: S

## M6

Five 'Details' windows showing domain properties for KS, ACP, TE, AT, and KR domains. Each window includes a 'Show in workspace' link and a 'Color' button.

- KS**
  - Domain properties: [Show in workspace](#)
  - DNA coordinates: 26337..27612 (1275 pb) [Color](#)
  - Protein frame: Forward 1
  - Protein coordinates: 8779..9204 (425 aa)
  - Score: 975.132
  - E-value: 2.00046E-293
  - Specificity:
- ACP**
  - Domain properties: [Show in workspace](#)
  - DNA coordinates: 30339..30540 (201 pb) [Color](#)
  - Protein frame: Forward 1
  - Protein coordinates: 10113..10180 (67 aa)
  - Score: 86.872
  - E-value: 4.94333E-26
  - Specificity:
- TE**
  - Domain properties: [Show in workspace](#)
  - DNA coordinates: 30744..31371 (627 pb) [Color](#)
  - Protein frame: Forward 1
  - Protein coordinates: 10248..10457 (209 aa)
  - Score: 232.227
  - E-value: 8.6657E-70
  - Specificity:
- AT**
  - Domain properties: [Show in workspace](#)
  - DNA coordinates: 27924..28863 (939 pb) [Color](#)
  - Protein frame: Forward 1
  - Protein coordinates: 9308..9621 (313 aa)
  - Score: 464.247
  - E-value: 1.23832E-139
  - Specificity: Prediction: [methylmalonyl](#)
- KR**
  - Domain properties: [Show in workspace](#)
  - DNA coordinates: 29541..30030 (489 pb) [Color](#)
  - Protein frame: Forward 1
  - Protein coordinates: 9847..10010 (163 aa)
  - Score: 273.751
  - E-value: 2.74058E-62
  - Activity:  Active
  - Specificity: Chirality of Me: R  
Chirality of OH: S

**B**

SMILES:

[C@H](C)[C@@H](O)[C@@H](C)[C@H](O)[C@H](C)C(=O)C(C)C[C@@H](C)[C@H](O)[C@@H](C)[C@H](O)C(C)C1(=O)

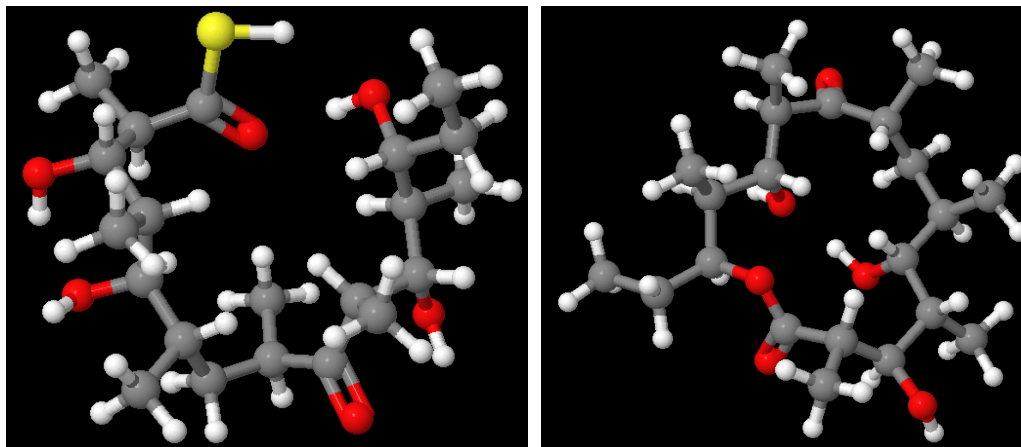

Fig. 1S Functional prediction of the DNA sequence (AF016585) of the niddamycin gene-cluster. The five genes (in red), seven modules (underlined in red) and 36 catalytically active domains (in blue) of the niddamycin gene-cluster are shown. In particular, the inactive KR in module 4 responsible for the hydroxyl-stereochemistry: S stereochemistry was predicted (A). The isomeric SMILES as well as the 3-D structure of the predicted linear chain is also shown (B top and right). The cyclization function predicts a ring structure that can also be displayed (B left).

A

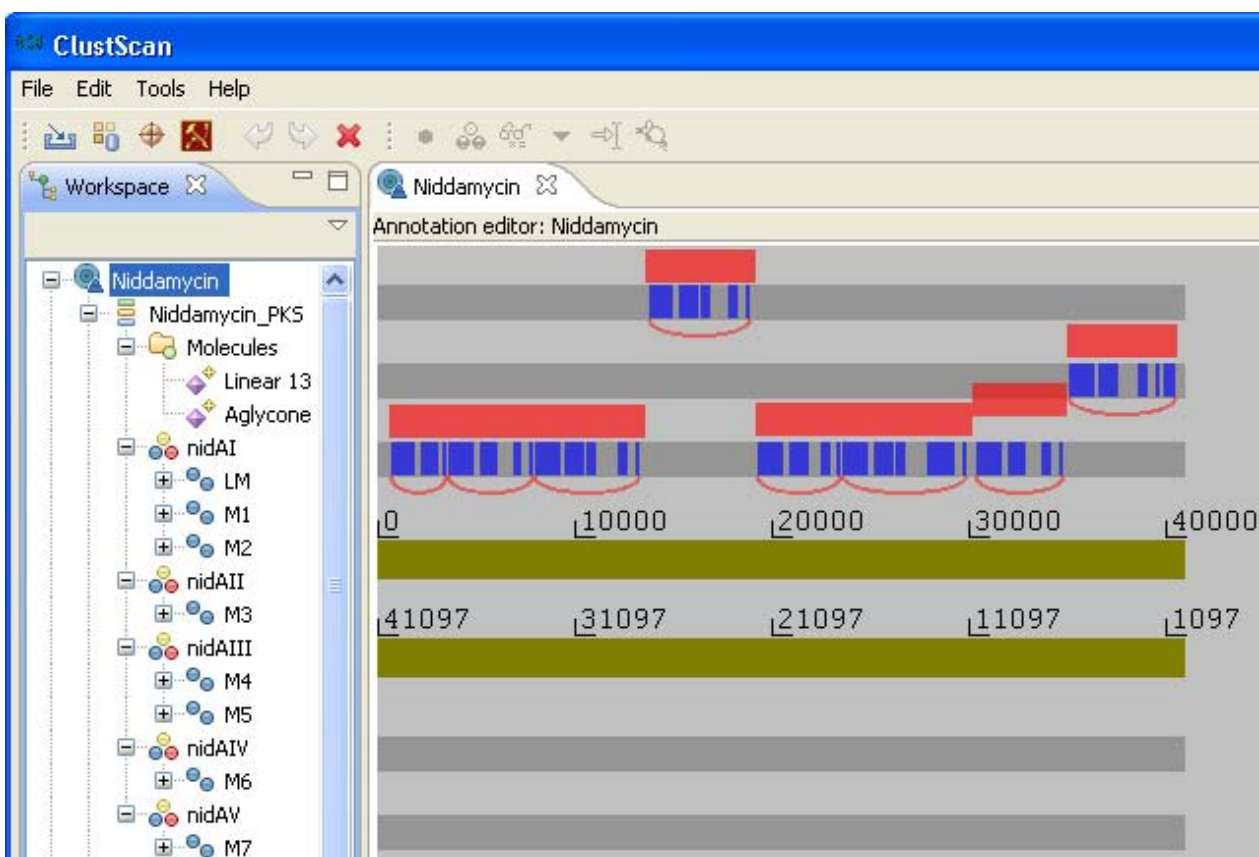

Gene: *nidAI*

LM

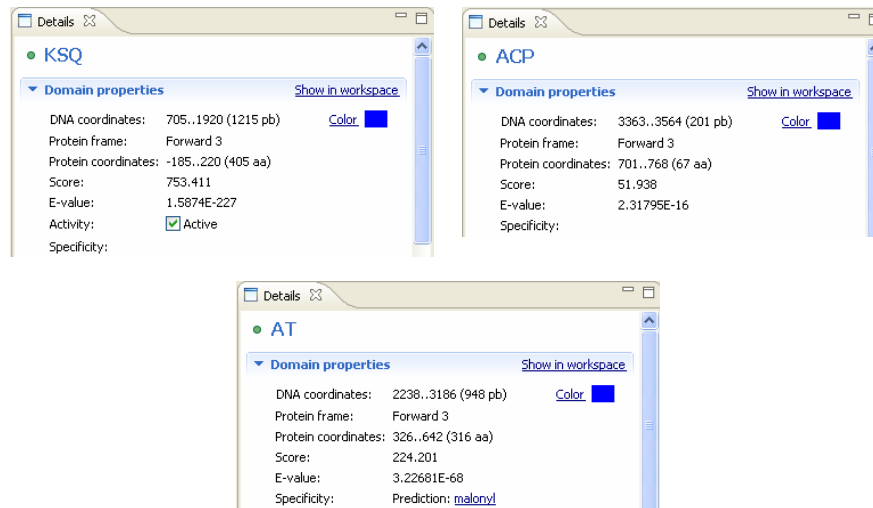

M1

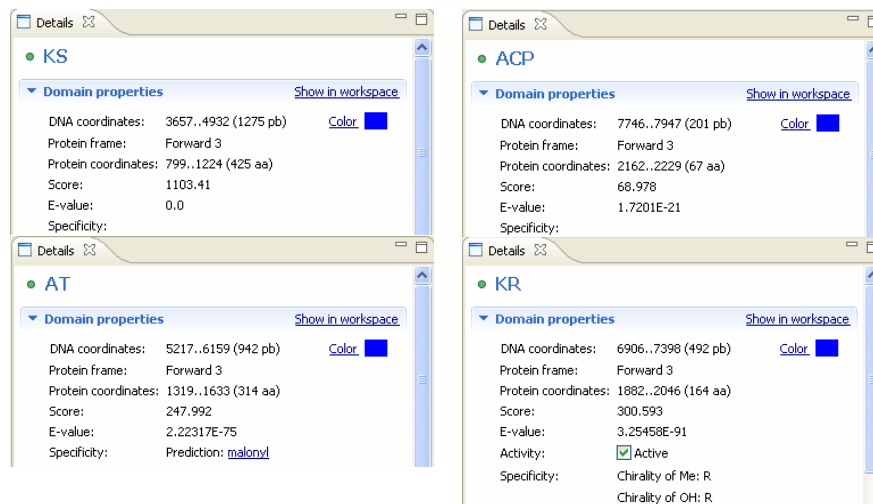

# M2

KS

- Domain properties
- DNA coordinates: 8037..9312 (1275 pb)
- Protein frame: Forward 3
- Protein coordinates: 2259..2684 (425 aa)
- Score: 1109.98
- E-value: 0.0
- Specificity:

ACP

- Domain properties
- DNA coordinates: 13116..13317 (201 pb)
- Protein frame: Forward 3
- Protein coordinates: 3952..4019 (67 aa)
- Score: 81.664
- E-value: 2.61027E-25
- Specificity:

AT

- Domain properties
- DNA coordinates: 9597..10539 (942 pb)
- Protein frame: Forward 3
- Protein coordinates: 2779..3093 (314 aa)
- Score: 254.181
- E-value: 3.04719E-77
- Specificity: Prediction: [malonyl](#)

DH

- Domain properties
- DNA coordinates: 10674..11196 (522 pb)
- Protein frame: Forward 3
- Protein coordinates: 3138..3312 (174 aa)
- Score: 260.103
- E-value: 5.02569E-79
- Activity:  Active
- Specificity: Activity probability: 80%

KR

- Domain properties
- DNA coordinates: 12225..12726 (501 pb)
- Protein frame: Forward 3
- Protein coordinates: 3655..3822 (167 aa)
- Score: 298.764
- E-value: 1.1563E-90
- Activity:  Active
- Specificity: Chirality of Me: R  
Chirality of OH: R

# Gene: *nidAII*

# M3

KS

- Domain properties
- DNA coordinates: 13803..15078 (1275 pb)
- Protein frame: Forward 1
- Protein coordinates: 4183..4608 (425 aa)
- Score: 1098.82
- E-value: 0.0
- Specificity:

ACP

- Domain properties
- DNA coordinates: 18720..18921 (201 pb)
- Protein frame: Forward 1
- Protein coordinates: 5822..5889 (67 aa)
- Score: 78.885
- E-value: 1.79163E-24
- Specificity:

AT

- Domain properties
- DNA coordinates: 15378..16320 (942 pb)
- Protein frame: Forward 1
- Protein coordinates: 4708..5022 (314 aa)
- Score: 249.861
- E-value: 6.08614E-76
- Specificity: Prediction: [malonyl](#)

DH

- Domain properties
- DNA coordinates: 16443..16959 (516 pb)
- Protein frame: Forward 1
- Protein coordinates: 5063..5235 (172 aa)
- Score: 220.258
- E-value: 4.96291E-67
- Activity:  Active
- Specificity: Activity probability: 80%

KR

- Domain properties
- DNA coordinates: 17841..18345 (504 pb)
- Protein frame: Forward 1
- Protein coordinates: 5529..5697 (168 aa)
- Score: 305.682
- E-value: 9.56196E-93
- Activity:  Active
- Specificity: Chirality of Me: R  
Chirality of OH: R

# Gene: *nidAIII*

## M4

KS

Domain properties

DNA coordinates: 19386..20661 (1275 pb) [Color](#)

Protein frame: Forward 3

Protein coordinates: 6251..6676 (425 aa)

Score: 1110.41

E-value: 0.0

Specificity:

ACP

Domain properties

DNA coordinates: 23370..23571 (201 pb) [Color](#)

Protein frame: Forward 3

Protein coordinates: 7579..7646 (67 aa)

Score: 76.565

E-value: 8.94618E-24

AT

Domain properties

DNA coordinates: 20976..21951 (975 pb) [Color](#)

Protein frame: Forward 3

Protein coordinates: 6781..7106 (325 aa)

Score: 469.037

E-value: 6.39424E-142

Specificity: Prediction: [methyImalonyl](#)

KR

Domain properties

DNA coordinates: 22536..23013 (477 pb) [Color](#)

Protein frame: Forward 3

Protein coordinates: 7301..7460 (159 aa)

Score: 129.003

E-value: 1.46631E-39

Activity:  Inactive

Specificity: Chirality of Me: 5

## M5

KS

Domain properties

DNA coordinates: 23658..24942 (1284 pb) [Color](#)

Protein frame: Forward 3

Protein coordinates: 7675..8103 (428 aa)

Score: 1067.68

E-value: 0.0

Specificity:

ACP

Domain properties

DNA coordinates: 29727..29928 (201 pb) [Color](#)

Protein frame: Forward 3

Protein coordinates: 9698..9765 (67 aa)

Score: 75.044

E-value: 2.56746E-23

Specificity:

AT

Domain properties

DNA coordinates: 25296..26256 (960 pb) [Color](#)

Protein frame: Forward 3

Protein coordinates: 8221..8541 (320 aa)

Score: 452.823

E-value: 4.86055E-137

Specificity: Prediction: [ghyImalonyl](#)

ER

Domain properties

DNA coordinates: 27903..28818 (915 pb) [Color](#)

Protein frame: Forward 3

Protein coordinates: 9090..9395 (305 aa)

Score: 728.489

E-value: 5.0461E-220

Activity:  Active

Specificity:

DH

Domain properties

DNA coordinates: 26376..26880 (504 pb) [Color](#)

Protein frame: Forward 3

Protein coordinates: 8581..8749 (168 aa)

Score: 247.115

E-value: 4.08296E-75

Activity:  Active

Specificity: Activity probability: 80%

KR

Domain properties

DNA coordinates: 28848..29349 (501 pb) [Color](#)

Protein frame: Forward 3

Protein coordinates: 9405..9572 (167 aa)

Score: 325.455

E-value: 1.0673E-98

Activity:  Active

Specificity: Chirality of Me: R  
Chirality of OH: R

# Gene: *nidAIV*

## M6

The image displays four separate windows, each showing the domain properties for a specific domain: KS, ACP, AT, and KR. Each window includes a 'Details' header and a 'Domain properties' section with a 'Show in workspace' link. The properties listed for each domain are as follows:

- KS:** DNA coordinates: 30435..31707 (1272 pb), Protein frame: Forward 3, Protein coordinates: 9842..10266 (424 aa), Score: 1049.78, E-value: 0.0, Specificity: (empty).
- ACP:** DNA coordinates: 34644..34845 (201 pb), Protein frame: Forward 3, Protein coordinates: 11245..11312 (67 aa), Score: 84.172, E-value: 4.58885E-26, Specificity: (empty).
- AT:** DNA coordinates: 32016..32976 (960 pb), Protein frame: Forward 3, Protein coordinates: 10369..10689 (320 aa), Score: 414.607, E-value: 1.55188E-125, Specificity: Prediction: [methoxymalonyl](#).
- KR:** DNA coordinates: 33792..34293 (501 pb), Protein frame: Forward 3, Protein coordinates: 10961..11128 (167 aa), Score: 255.24, E-value: 1.46251E-77, Activity:  Active, Specificity: Chirality of Me: R, Chirality of OH: S.

# Gene: *nidAV*

## M7

The image displays five separate windows, each showing the domain properties for a specific domain: KS, ACP, TE, AT, and KR. Each window includes a 'Details' header and a 'Domain properties' section with a 'Show in workspace' link. The properties listed for each domain are as follows:

- KS:** DNA coordinates: 35130..36402 (1272 pb), Protein frame: Forward 2, Protein coordinates: 8852..9276 (424 aa), Score: 1066.19, E-value: 0.0, Specificity: (empty).
- ACP:** DNA coordinates: 39501..39702 (201 pb), Protein frame: Forward 2, Protein coordinates: 10309..10376 (67 aa), Score: 70.795, E-value: 4.88182E-22, Specificity: (empty).
- TE:** DNA coordinates: 39927..40569 (642 pb), Protein frame: Forward 2, Protein coordinates: 13308..13522 (214 aa), Score: 214.407, E-value: 2.86459E-65, Specificity: (empty).
- AT:** DNA coordinates: 36693..37659 (966 pb), Protein frame: Forward 2, Protein coordinates: 9373..9695 (322 aa), Score: 224.892, E-value: 1.99877E-68, Specificity: Prediction: [malonyl](#).
- KR:** DNA coordinates: 38637..39138 (501 pb), Protein frame: Forward 2, Protein coordinates: 10021..10188 (167 aa), Score: 255.24, E-value: 1.46251E-77, Activity:  Active, Specificity: Chirality of Me: R, Chirality of OH: S.

**B**

SMILES:

C[C@@H](O)C=CC=CCC(=O)[C@@H](C)C[C@@H](CC)  
[C@H](O)[C@@H](CC)[C@H](O)CC(=O)S

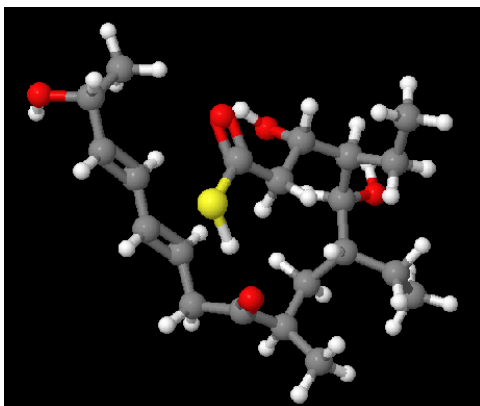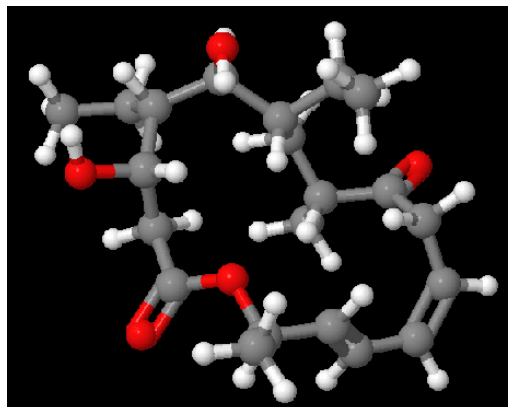

Supplement: gkn685_1.pdf [file gkn685_1.pdf]
