# Supplementary material for: ClustScan: an integrated program package for the semi-automatic annotation of modular biosynthetic gene clusters and in silico prediction of novel chemical structures
Source: PubMed Central journal article supplement — Nucleic Acids Res. 2008 Oct 31;36(21):6882–92. doi: 10.1093/nar/gkn685 (PMC2588505; doi:10.1093/nar/gkn685), 2008-10-31

## Supplementary Data 2

Fig. 1S Gene cluster annotation for the erythromycin producing polyketide synthase, comparing the original sequence annotation (Genbank accession number AY661566) with *ab initio* gene predictions using the SEARCHPKS and **ClustScan** annotation programs

Fig. 2S Gene cluster annotation for the niddamycin producing polyketide synthase, comparing the original sequence annotation (Genbank accession number AF016585) with *ab initio* gene predictions using the SEARCHPKS and **ClustScan** n annotation programs

Fig. 3S Gene cluster annotation for the tylactone producing polyketide synthase, comparing the original sequence annotation (Genbank accession number SFU78289 ) with *ab initio* gene predictions using the SEARCHPKS and **ClustScan** annotation programs

Fig. 4S Gene cluster annotation for the rifamycin producing polyketide synthase, comparing the original sequence annotation (Genbank accession number AF040570) with *ab initio* gene predictions using the SEARCHPKS and **ClustScan** annotation programs

Supplementary Data 2 Figure 1S: Gene cluster annotation for the erythromycin producing polyketide synthase, comparing the original sequence annotation (Genbank accession number AY661566) with *ab initio* gene predictions using the SearchPKS and ClustScan annotation programs.

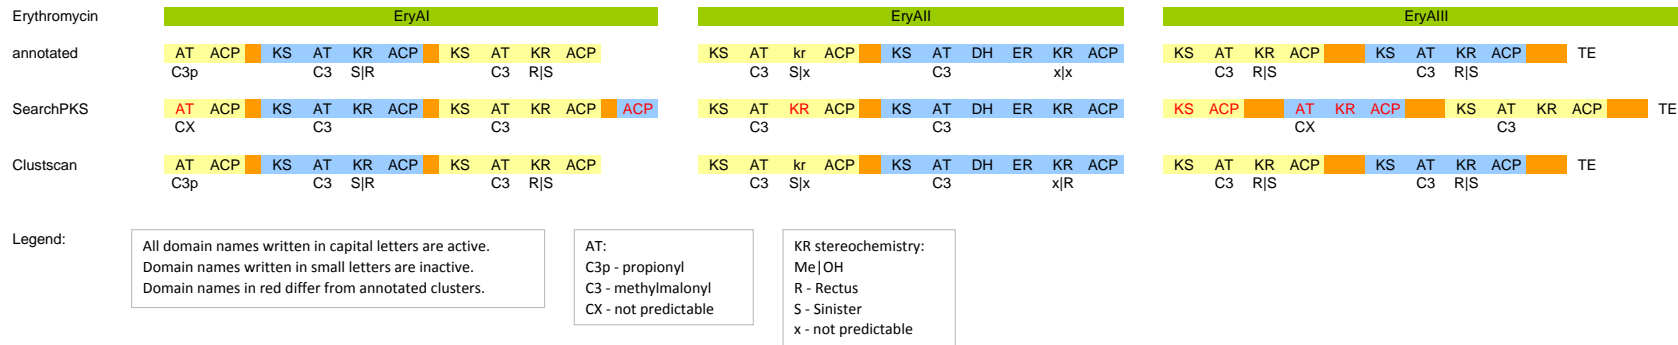

## POTENTIAL POLYKETIDE DOMAIN ORGANISATION OF YOUR SEQUENCE

Click any image below

[Your sequence](#)

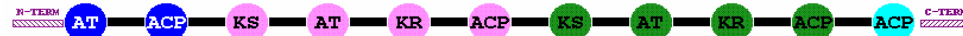

APPROX PRODUCT CHEMISTRY :

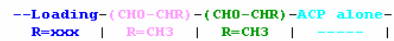

[Your sequence](#)

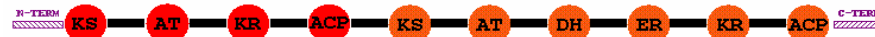

APPROX PRODUCT CHEMISTRY :

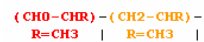

[Your sequence](#)

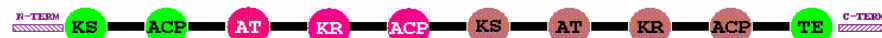

APPROX PRODUCT CHEMISTRY :

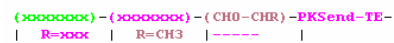

Supplementary Data 2 Figure 2S: Gene cluster annotation for the niddamycin producing polyketide synthase, comparing the original sequence annotation (Genbank accession number AF016585) with *ab initio* gene predictions using the SearchPKS and ClustScan annotation programs.

| Niddamycin | nidA1             | nidA2                 | nidA3                 | nidA4                    | nidA5              |
|------------|-------------------|-----------------------|-----------------------|--------------------------|--------------------|
| annotated  | KSQ AT ACP<br>C2a | KS AT DH KR ACP<br>C2 | KS AT kr ACP<br>C3    | KS AT DH ER KR ACP<br>EM | KS AT KR ACP<br>C2 |
| SearchPKS  | KS AT ACP<br>C2   | KS AT KR ACP<br>C2    | KS AT DH KR ACP<br>C2 | KS AT KR ACP<br>EM       | KS AT KR ACP<br>C2 |
| ClustScan  | KSQ AT ACP<br>C2a | KS AT DH KR ACP<br>C2 | KS AT kr ACP<br>C3    | KS AT DH ER KR ACP<br>EM | KS AT KR ACP<br>C2 |

Legend:

All domain names written in capital letters are active.  
Domain names written in small letters are inactive.  
Domain names in red differ from annotated clusters.

AT: malonyl  
C2 - malonyl  
C2a - acetyl  
C3 - methylmalonyl  
MM - methoxymalonyl  
EM - ethylmalonyl  
CX - not predictable

KR stereochemistry:  
Me|OH  
R - Rectus  
S - Sinister  
x - not predictable

## POTENTIAL POLYKETIDE DOMAIN ORGANISATION OF YOUR SEQUENCE

Click any image below

[Your sequence](#)

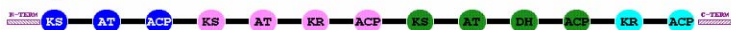

APPROX PRODUCT CHEMISTRY :

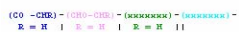

[Your sequence](#)

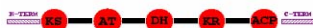

APPROX PRODUCT CHEMISTRY :

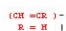

[Your sequence](#)

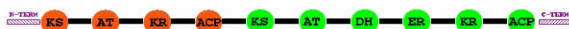

APPROX PRODUCT CHEMISTRY :

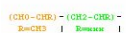

[Your sequence](#)

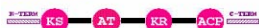

APPROX PRODUCT CHEMISTRY :

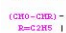

[Your sequence](#)

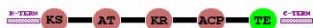

APPROX PRODUCT CHEMISTRY :

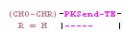

Supplementary Data 2 Figure 3S: Gene cluster annotation for the tyactone producing polyketide synthase, comparing the original sequence annotation (Genbank accession number SFU78289 ) with *ab initio* gene predictions using the SearchPKS and ClustScan annotation programs.

| Tyactone  | tyIG1                    | tyIG2                     | tyIG3                  | tyIG4                        | tyIG5                  |
|-----------|--------------------------|---------------------------|------------------------|------------------------------|------------------------|
| annotated | KSQ AT ACP<br>C3p C3 R R | KS AT DH KR ACP<br>C2 x x | KS AT kr ACP<br>C3 x x | KS AT DH ER KR ACP<br>EM x x | KS AT KR ACP<br>C2 x S |
| SearchPKS | KS AT ACP<br>C3          | KS AT DH KR ACP<br>C2     | KS AT KR ACP<br>C3     | KS AT DH ER KR ACP<br>EM     | KS AT KR ACP<br>C2     |
| ClustScan | KSQ AT ACP<br>C3p        | KS AT DH KR ACP<br>C2 R R | KS AT kr ACP<br>C3 S x | KS AT DH ER KR ACP<br>EM R R | KS AT KR ACP<br>C2 R S |

Legend: All domain names written in capital letters are active. Domain names written in small letters are inactive. Domain names in red differ from annotated clusters.

AT: C2 - malonyl  
C3 - methylmalonyl  
C3p - propionyl  
EM - ethylmalonyl  
CX - not predictable

KR stereochemistry: Me|OH  
R - Rectus  
S - Sinister  
x - not predictable

## POTENTIAL POLYKETIDE DOMAIN ORGANISATION OF YOUR SEQUENCE

Click any image below

Your sequence

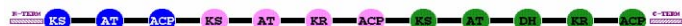

APPROX PRODUCT CHEMISTRY :

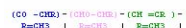

Your sequence

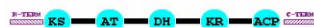

APPROX PRODUCT CHEMISTRY :

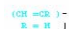

Your sequence

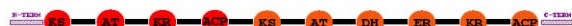

APPROX PRODUCT CHEMISTRY :

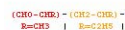

Your sequence

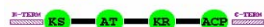

APPROX PRODUCT CHEMISTRY :

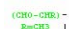

Your sequence

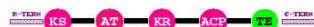

APPROX PRODUCT CHEMISTRY :

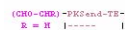

Supplementary Data 2 Figure 4S: Gene cluster annotation for the rifamycin producing polyketide synthase, comparing the original sequence annotation (Genbank accession number AF040570) with *in silico* gene predictions using the SearchPKS and ClustScan annotation programs.

| Rifamycin | rifA                                                              | rifB                                                                    | rifC                      | rifD                      | rifE                                                |
|-----------|-------------------------------------------------------------------|-------------------------------------------------------------------------|---------------------------|---------------------------|-----------------------------------------------------|
| annotated | ACP KS AT dh KR ACP KS AT ACP KS AT kr ACP<br>C3 x R C2 C3 x x    | KS AT DH KR ACP KS AT dh KR ACP KS AT dh KR ACP<br>C3 x x C3 R S C3 S R | KS AT dh KR ACP<br>C3 S S | KS AT dh KR ACP<br>C3 R R | KS AT DH KR ACP KS AT DH KR ACP<br>C2 x x C3 C3 x x |
| SearchPKS | ACP KS AT DH KR ACP KS AT ACP KS AT KR ACP<br>C3 C2 C3            | KS AT DH KR ACP KS AT DH KR ACP KS AT DH KR ACP<br>C3 C3 C3             | KS AT DH KR ACP<br>C3     | KS AT DH KR ACP<br>C3     | KS AT DH KR ACP KS AT DH KR ACP<br>C2 C3            |
| ClustScan | ACP KS AT dh KR ACP KS AT ACP KS AT dh kr ACP<br>C3 R R C2 C3 R x | KS AT DH KR ACP KS AT dh KR ACP KS AT DH KR ACP<br>C3 R R C3 x S C3 x S | KS AT DH KR ACP<br>C3 x S | KS AT dh KR ACP<br>C3 R R | KS AT DH KR ACP KS AT DH KR ACP<br>C2 R R C3 x S    |

Legend:

All domain names written in capital letters are active.  
Domain names written in small letters are inactive.  
Domain names in red differ from annotated clusters.

AT:  
C2 - malonyl  
C3 - methylmalonyl  
CX - not predictable

KR stereochemistry:  
Me|OH  
R - Rectus  
S - Sinister  
x - not predictable

## POTENTIAL POLYKETIDE DOMAIN ORGANISATION OF YOUR SEQUENCE

Click any image below

Your sequence

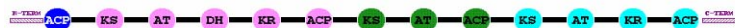

APPROX PRODUCT CHEMISTRY :

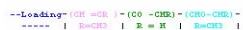

Your sequence

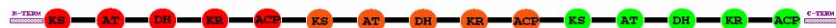

APPROX PRODUCT CHEMISTRY :

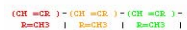

Your sequence

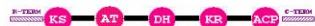

APPROX PRODUCT CHEMISTRY :

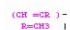

Your sequence

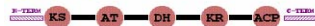

APPROX PRODUCT CHEMISTRY :

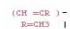

Your sequence

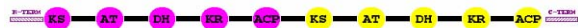

APPROX PRODUCT CHEMISTRY :

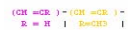

Supplement: gkn685_2.pdf [file gkn685_2.pdf]
